# Supplementary material for: Achieving plasmon reproducibility from surfactant free gold nanostar synthesis
Source: Royal Society of Chemistry journal article supplement (doi:10.1039/c5nj01590a), 2015-01-01
Supplement: c5nj01590a1.pdf [file c5nj01590a1.pdf]

ASSOCIATED CONTENT

**Supporting Information.**

# Achieving Plasmon Reproducibility from Surfactant Free Gold Nanostar Synthesis

*Jacob D. Ramsey, Lixia Zhou, C. Kyle Almlie, Jordan D. Lange<sup>†</sup>, and Sean M. Burrows\**

Department of Chemistry, Oregon State University, Corvallis, Oregon 97331, United States of  
America

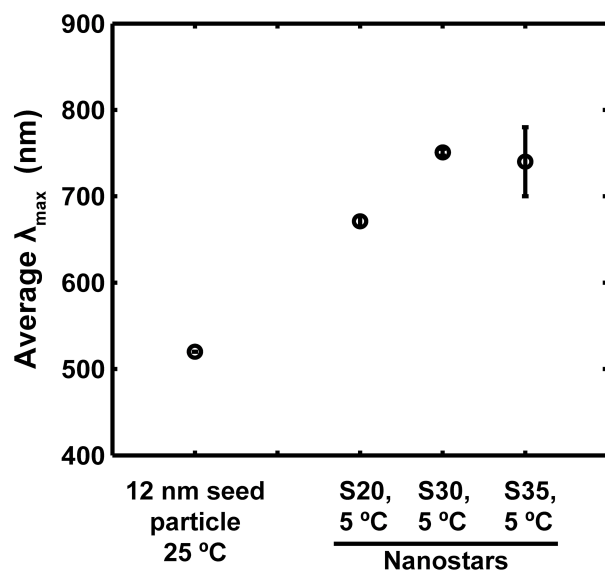

**Figure S1.** Average plasmon  $\lambda_{\text{max}}$  as a function of silver concentration during nanostar synthesis at 5 °C and comparison to the seed solution. S20 (n = 3) nanostars used 20  $\mu\text{M}$   $\text{AgNO}_3$  for synthesis, S30 (n = 4), used 30  $\mu\text{M}$   $\text{AgNO}_3$  for synthesis, and S35 (n = 3) used 35  $\mu\text{M}$   $\text{AgNO}_3$  for synthesis (all concentrations were the final concentration in reaction vessel). The average  $\lambda_{\text{max}}$  red shifts with respect to the seed solution (n = 4) as silver content was increased during synthesis. Beyond 30  $\mu\text{M}$   $\text{AgNO}_3$  no significant red shift was observed and reproducibility of  $\lambda_{\text{max}}$  was lost at 5 °C. Error bars represent  $\pm$  one standard deviation unit; in some cases the error bars are the same size or smaller than the symbol.

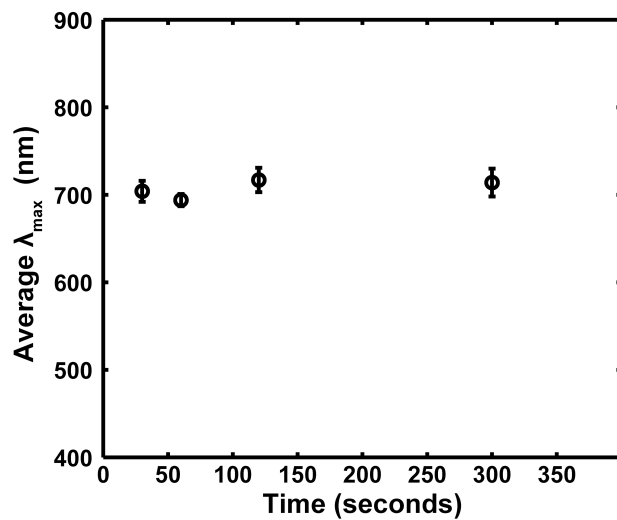

**Figure S2.** Plot of the S30 nanostars average  $\lambda_{\text{max}}$  vs. reaction time in seconds. No statistical difference in the average  $\lambda_{\text{max}}$  was observed between the time points. We concluded from this data that the reaction was complete within the first 30 seconds. The error bars represent  $\pm$  one standard deviation unit (n = 3); in some cases the error bars were the same size as the symbol.

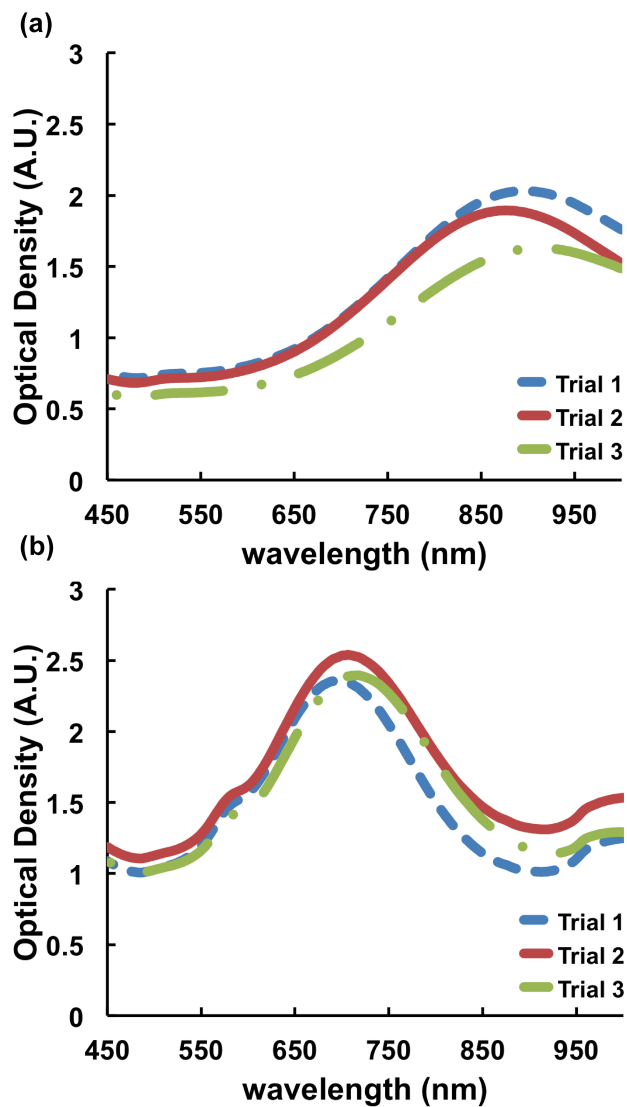

**Figure S3.** Concentration matched samples using data from Nanosight. (a) 25 °C nanostars showed similar optical density signals after diluting samples to the same concentration ( $4.74 \times 10^{10}$  nanostars/mL). (b) 5 °C nanostars showed similar optical density signals after diluting samples to the same concentration ( $1.25 \times 10^{11}$  nanostars/mL).
